# Supplementary material for: Bach Flower Remedies for psychological problems and pain: a systematic review
Source: Springer Nature journal article supplement (doi:10.1186/1472-6882-9-16), 2009-05-26

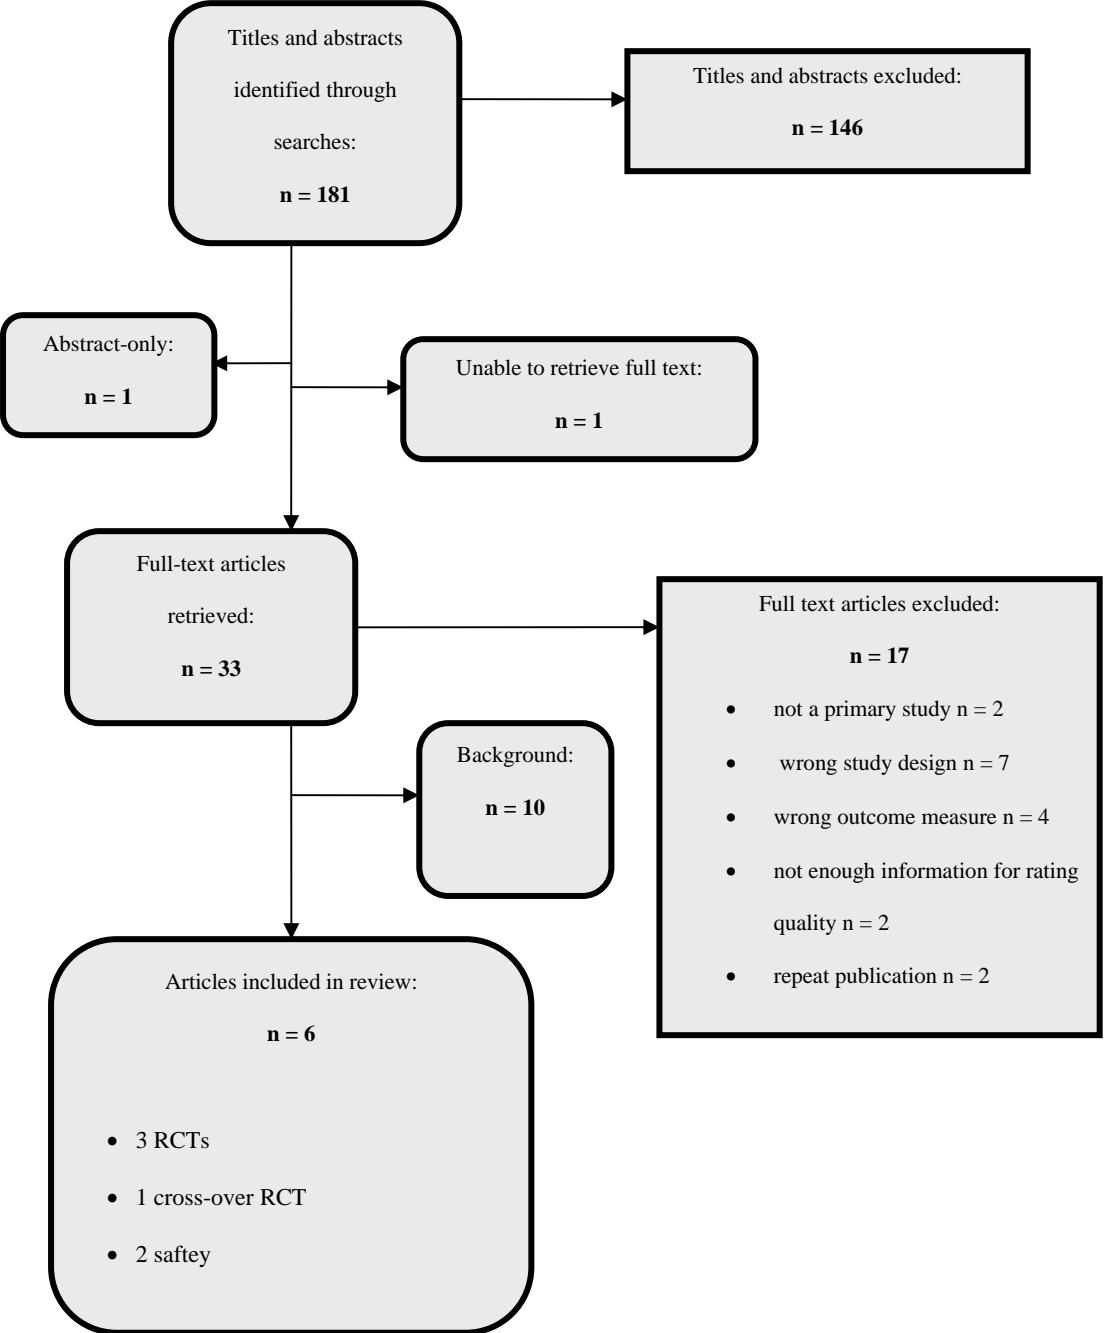

Supplement: 12906_2009_241_MOESM2_ESM.pdf [file 12906_2009_241_MOESM2_ESM.pdf]
